# Supplementary material for: Comparative Analysis of Saliva and Plasma Proteins Patterns in Pregnant Cows—Preliminary Studies
Source: MDPI journal article supplement (doi:10.3390/ani12202850), 2022-10-20
Supplement: s1 [file s1]

| SPOT | UniProt ID <sup>u</sup> | SCORE/<br>MATCHES | SEQ.<br>COV. | PROTEIN                                                      | PROTEIN CLASS <sup>p</sup>                                                                                                      | LOCALIZATION <sup>u</sup>                                                  | MOLECULAR<br>FUNCTION <sup>u</sup>                                                                       | BIOLOGICAL<br>PROCESS <sup>u</sup>                                                                        |
|------|-------------------------|-------------------|--------------|--------------------------------------------------------------|---------------------------------------------------------------------------------------------------------------------------------|----------------------------------------------------------------------------|----------------------------------------------------------------------------------------------------------|-----------------------------------------------------------------------------------------------------------|
| c3   | Q3ZCI9<br>(TCPQ_BOVIN)  | 119/11            | 26%          | <b>T-complex protein 1 subunit theta</b>                     | <b>Plasma proteins,</b><br>Predicted intracellular proteins,                                                                    | <b>INTRACELLULAR</b><br>(cytoskeleton, cytosol)                            | ATP binding<br>Unfolded protein binding                                                                  | Protein folding                                                                                           |
| c4   | Q2KJF1<br>(A1BG_BOVIN)  | 93/13             | 48%          | <b>Alpha-1B-glycoprotein</b>                                 | <b>Plasma proteins,</b><br>Predicted intracellular proteins,<br>Predicted secreted proteins,                                    | <b>EXTRACELLULAR</b><br>(secreted - liver)                                 | Unknown                                                                                                  | Platelet degranulation<br>Neutrophil degranulation                                                        |
| c12  | Q95215<br>(BGH3_RABIT)  | 99/10             | 21%          | <b>Transforming growth factor-beta-induced protein ig-h3</b> | <b>Plasma proteins,</b><br>Predicted intracellular proteins,<br>Predicted secreted proteins<br>Disease related genes            | <b>EXTRACELLULAR</b><br>(secreted)                                         | Collagen binding<br>Extracellular matrix binding<br>Integrin binding                                     | Cell adhesion                                                                                             |
| c19  | Q9GK13<br>(MUTA_BOVIN ) | 58/14             | 28%          | <b>Methylmalonyl-CoA mutase, mitochondrial</b>               | <b>Plasma proteins,</b><br>Predicted intracellular proteins,<br>Disease related genes,<br>Enzymes,<br>FDA approved drug targets | <b>INTRACELLULAR</b><br>(mitochondrion matrix)                             | GTPase activity<br>Cobalamin binding<br>Metal ion binding<br>Catalytic activity                          | Isomerase<br>Metabolism                                                                                   |
| c23  | P27124<br>(FKBP4_RABIT) | 97/9              | 31%          | <b>Peptidyl-prolyl cis-trans isomerase FKBP4</b>             | <b>Plasma proteins,</b><br>Predicted intracellular proteins,                                                                    | <b>INTRACELLULAR</b><br>(nucleus, cytosol, cytoskeleton and mitochondrion) | ATP & GTP binding<br>Glucocorticoid receptor binding<br>Heat shock protein binding<br>Isomerase activity | Androgen receptor signalling pathway<br>Protein folding<br>Embryo implantation & male sex differentiation |

| SPOT | UniProt ID <sup>u</sup>  | SCORE/<br>MATCHES | SEQ.<br>COV. | PROTEIN                                      | PROTEIN CLASS <sup>p</sup>                                                                                                   | LOCALIZATION <sup>u</sup>                             | MOLECULAR<br>FUNCTION <sup>u</sup>           | BIOLOGICAL<br>PROCESS <sup>u</sup>                                           |
|------|--------------------------|-------------------|--------------|----------------------------------------------|------------------------------------------------------------------------------------------------------------------------------|-------------------------------------------------------|----------------------------------------------|------------------------------------------------------------------------------|
|      |                          |                   |              |                                              |                                                                                                                              |                                                       |                                              | Steroid hormone receptor complex assembly                                    |
| c25  | Q9TTC6<br>(PPIA_RABIT)   | 70/5              | 28%          | <b>Peptidyl-prolyl cis-trans isomerase A</b> | <b>Plasma proteins,</b><br>Predicted intracellular proteins,<br>Enzymes,                                                     | <b>EXTRACELLULAR</b><br>(secreted - cytosol, nucleus) | Cyclosporine A binding<br>Isomerase activity | Protein folding<br>Protein isomerisation                                     |
| c27  | P08831<br>(IL1A_BOVIN)   | 66/7              | 27%          | <b>Interleukin-1 alpha</b>                   | <b>Plasma proteins,</b><br>Predicted intracellular proteins,<br>Transporters,<br>Cancer-related genes,                       | <b>EXTRACELLULAR</b><br>(secreted – cytosol)          | Cooper ion binding<br>Cytokine activity      | Cytokine-mediated signaling pathway<br>Inflammatory response<br>Pyrogen      |
| c27  | Q3T0P6<br>(PGK1_BOVIN)   | 64/7              | 25%          | <b>Phosphoglycerate kinase 1</b>             | <b>Plasma proteins,</b><br>Predicted intracellular proteins,<br>Disease related genes,<br>Enzymes,<br>Potential drug targets | <b>INTRACELLULAR</b><br>(cytosol)                     | ATP binding<br>Catalytic activity            | Glycolytic process<br>Epithelial cell differentiation<br>Response to hypoxia |
| c21  | Q0VCP3<br>(OLFL3_BOVIN ) | 62/6              | 17%          | <b>Olfactomedin-like protein 3</b>           | <b>Predicted secreted proteins ,</b><br>Predicted intracellular proteins,                                                    | <b>EXTRACELLULAR</b><br>(secreted)                    | Unknown                                      | Multicellular organism development (developmental protein)                   |
| c7   | Q3SZE9<br>(TBCC_BOVIN)   | 76/7              | 29%          | <b>Tubulin-specific chaperone C</b>          | <b>Predicted intracellular proteins,</b>                                                                                     | <b>INTRACELLULAR</b><br>(cytosol)                     | GTPase activity<br>Tubulin binding           | Cell morphogenesis                                                           |

| SPOT | UniProt ID <sup>u</sup>     | SCORE/<br>MATCHES | SEQ.<br>COV. | PROTEIN                                                                             | PROTEIN CLASS <sup>p</sup>                                                                                                                       | LOCALIZATION <sup>u</sup>                                  | MOLECULAR<br>FUNCTION <sup>u</sup>                                                                              | BIOLOGICAL<br>PROCESS <sup>u</sup>                                                                                                                                   |
|------|-----------------------------|-------------------|--------------|-------------------------------------------------------------------------------------|--------------------------------------------------------------------------------------------------------------------------------------------------|------------------------------------------------------------|-----------------------------------------------------------------------------------------------------------------|----------------------------------------------------------------------------------------------------------------------------------------------------------------------|
|      |                             |                   |              |                                                                                     |                                                                                                                                                  |                                                            |                                                                                                                 | Tubulin<br>complex<br>assembly<br>Protein folding                                                                                                                    |
| c18  | A5PK00<br>(VPS36_BOVIN<br>) | 116/10            | 38%          | <b>Vacuolar protein-<br/>sorting-associated<br/>protein 36</b>                      | <b>Predicted intracellular<br/>proteins,</b>                                                                                                     | <b>INTRACELLULAR</b><br>(nucleus,<br>endosome)             | Lipid binding<br>Ubiquitin<br>binding                                                                           | Protein<br>transport (to<br>vacuole<br>involved in<br>ubiquitin-<br>dependent<br>protein<br>catabolic<br>process)<br>Transcription<br>Regulation of<br>transcription |
| c20  | P05128<br>(KPCG_BOVIN)      | 106/9             | 22%          | <b>Protein kinase C<br/>gamma type</b>                                              | <b>Predicted intracellular<br/>proteins,</b><br>Disease related genes,<br>Enzymes,<br>Potential drug targets,<br>RAS pathway related<br>proteins | <b>INTRACELLULAR</b><br>(cell membrane,<br>cytosol)        | ATP binding<br>Protein kinase<br>activity<br>Zinc ion binding                                                   | Catalytic<br>activity<br>Intracellular<br>signal<br>transduction<br>Biological<br>rhythms                                                                            |
| c22  | A4IFK7<br>(RIPL2_BOVIN)     | 67/6              | 34%          | <b>RILP-like protein 2<br/>(Rab Interacting<br/>Lysosomal Protein –<br/>like 2)</b> | <b>Predicted intracellular<br/>proteins,</b>                                                                                                     | <b>INTRACELLULAR</b><br>(cytoskeleton,<br>cytosol, cilium) | Dynein light<br>intermediate<br>chain binding<br>Small GTPase<br>binding<br>Protein<br>dimerization<br>activity | Cilium<br>assembly<br>Epithelial cell<br>morphogenesis<br>Protein<br>transport<br>(from ciliary                                                                      |

| SPOT | UniProt ID <sup>u</sup> | SCORE/<br>MATCHES | SEQ.<br>COV. | PROTEIN                                                                            | PROTEIN CLASS <sup>p</sup>                                         | LOCALIZATION <sup>u</sup>                              | MOLECULAR<br>FUNCTION <sup>u</sup> | BIOLOGICAL<br>PROCESS <sup>u</sup>                                                              |
|------|-------------------------|-------------------|--------------|------------------------------------------------------------------------------------|--------------------------------------------------------------------|--------------------------------------------------------|------------------------------------|-------------------------------------------------------------------------------------------------|
|      |                         |                   |              |                                                                                    |                                                                    |                                                        |                                    | membrane to plasma membrane)                                                                    |
| c24  | A6QL79<br>(NATD1_BOVIN) | 64/4              | 53%          | <b>Protein NATD1 ( N-acetyltransferase domain-containing protein 1)</b>            | <b>Predicted intracellular proteins,</b>                           | <b>INTRACELLULAR</b>                                   | Unknown                            | Unknown                                                                                         |
| c26  | E1BLZ4<br>(ZFY26_BOVIN) | 105/15            | 9%           | <b>Zinc finger FYVE domain-containing protein 26</b>                               | <b>Predicted intracellular proteins,</b><br>Disease related genes, | <b>INTRACELLULAR</b><br>(cytoskeleton, cytosol)        | Metal ion binding<br>PIP3 binding  | Cell cycle<br>Cell division<br>Regulation of cytokinesis<br>DNA repair                          |
| c31  | O97725<br>(NDUAC_BOVIN) | 81/5              | 46%          | <b>NADH dehydrogenase [ubiquinone] 1 alpha subcomplex subunit 12</b>               | <b>Predicted intracellular proteins,</b><br>Disease related genes, | <b>INTRACELLULAR</b><br>(mitochondrion inner membrane) | Electron transfer activity         | Electron transport<br>Respiratory chain<br>Mitochondrial ATP synthesis                          |
| c32  | E1BFE9<br>(BI2L2_BOVIN) | 62/7              | 17%          | <b>Brain-specific angiogenesis inhibitor 1-associated protein 2-like protein 2</b> | <b>Predicted intracellular proteins,</b>                           | <b>INTRACELLULAR</b><br>(cell membrane)                | Phospholipid binding               | Actin crosslink formation<br>Insulin receptor signalling pathway<br>Actin filament organisation |

<sup>u</sup> – data obtained from <https://www.uniprot.org/>

<sup>p</sup> – data obtained from <https://www.proteinatlas.org/>

Matches - the number of peptides in the MS spectrum that match the sequences from the database.

SEQ COV = sequence coverage - what percentage of the protein found in the study is covered by peptides from the MS spectrum.
