# Supplementary material for: Comparative Analysis of Saliva and Plasma Proteins Patterns in Pregnant Cows—Preliminary Studies
Source: MDPI journal article supplement (doi:10.3390/ani12202850), 2022-10-20
Supplement: s1 [file s1]

| SPOT | UniProt ID <sup>u</sup>     | SCORE/<br>MATCHES | SEQ.<br>COV. | PROTEIN                                            | PROTEIN CLASS <sup>p</sup>                                                                                                               | LOCALIZATION <sup>u</sup>                                                                   | MOLECULAR<br>FUNCTION <sup>u</sup>                                                          | BIOLOGICAL<br>PROCESS <sup>u</sup>                                                      |
|------|-----------------------------|-------------------|--------------|----------------------------------------------------|------------------------------------------------------------------------------------------------------------------------------------------|---------------------------------------------------------------------------------------------|---------------------------------------------------------------------------------------------|-----------------------------------------------------------------------------------------|
| b24  | Q27954<br>(COPA_BOVIN)      | 120/17            | 12%          | <b>Coatomer subunit<br/>alpha</b>                  | <b>Plasma proteins,</b><br>Predicted intracellular<br>proteins,<br>Disease related genes,                                                | <b>INTRACELLULAR</b><br>(Golgi apparatus<br>membrane)<br><b>EXTRACELLULAR</b><br>(secreted) | Hormone<br>activity<br>Structural<br>molecule<br>activity                                   | Intracellular<br>protein<br>transport (ER -<br>Golgi vesicle-<br>mediated<br>transport) |
| b34  | Q58DG6<br>(FXL20_BOVIN<br>) | 96/9              | 20%          | <b>F-box/LRR-repeat<br/>protein 20</b>             | <b>Plasma proteins,</b><br>Predicted intracellular<br>proteins,                                                                          | <b>INTRACELLULAR</b><br>(cytosol)                                                           | Unknown                                                                                     | behavioral<br>fear response<br>ubiquitin<br>conjugation<br>pathway                      |
| b35  | Q9GK13<br>(MUTA_BOVIN<br>)  | 104/11            | 26%          | <b>Methylmalonyl-CoA<br/>mutase, mitochondrial</b> | <b>Plasma proteins,</b><br>Predicted intracellular<br>proteins,<br>Disease related genes,<br>Enzymes,<br>FDA approved drug<br>targets,   | <b>INTRACELLULAR</b><br>(mitochondrion<br>matrix)                                           | GTPase<br>activity<br>Cobalamin<br>binding<br>Metal ion<br>binding<br>Catalytic<br>activity | Isomerase<br>Metabolism                                                                 |
| b45  | Q29RR5<br>(TFP11_BOVIN<br>) | 72/10             | 13%          | <b>Tuftelin-interacting<br/>protein 11</b>         | <b>Plasma proteins,</b><br>Predicted intracellular<br>proteins,                                                                          | <b>INTRACELLULAR</b><br>(nucleus, cytosol)                                                  | Nucleic acid<br>binding                                                                     | Biom mineralizati<br>on<br>Spliceosomal<br>complex<br>disassembly                       |
| b49  | P0DM93<br>(APOA2_LEPW<br>E) | 60/3              | 37%          | <b>Apolipoprotein A-II</b>                         | <b>Plasma proteins,</b><br>Predicted secreted<br>proteins,<br>Predicted intracellular<br>proteins,<br>Cancer-related genes,<br>Candidate | <b>EXTRACELLULAR</b><br>(secreted)                                                          | Lipid binding                                                                               | Lipid transport<br>Lipoprotein<br>metabolism                                            |

| SPOT | UniProt ID <sup>u</sup> | SCORE/<br>MATCHES | SEQ.<br>COV. | PROTEIN                                       | PROTEIN CLASS <sup>p</sup>                                                                                                                  | LOCALIZATION <sup>u</sup>                          | MOLECULAR<br>FUNCTION <sup>u</sup>                                                            | BIOLOGICAL<br>PROCESS <sup>u</sup>                       |
|------|-------------------------|-------------------|--------------|-----------------------------------------------|---------------------------------------------------------------------------------------------------------------------------------------------|----------------------------------------------------|-----------------------------------------------------------------------------------------------|----------------------------------------------------------|
|      |                         |                   |              |                                               | cardiovascular disease<br>genes,                                                                                                            |                                                    |                                                                                               |                                                          |
| b50  | P68226<br>(HBB_LAMGL)   | 56/5              | 49%          | <b>Hemoglobin subunit<br/>beta</b>            | <b>Plasma proteins,</b><br>Predicted intracellular<br>proteins,<br>Transporters,<br>Disease related genes,<br>FDA approved drug<br>targets, | <b>INTRACELLULAR</b><br>(cytosol,<br>erythrocytes) | Heme<br>binding<br>Metal ion<br>binding<br>Oxygen<br>binding<br>Oxygen<br>carrier<br>activity | Oxygen<br>transport<br>Transport                         |
| b54  | Q5E9B1<br>(LDHB_BOVIN)  | 74/7              | 21%          | <b>L-lactate<br/>dehydrogenase B chain</b>    | <b>Plasma proteins,</b><br>Predicted intracellular<br>proteins,<br>Enzymes,<br>Disease related genes,<br>Potential drug targets,            | <b>INTRACELLULAR</b><br>(cytosol)                  | Oxidoreductase activity                                                                       | Carbohydrate<br>metabolic<br>process                     |
| b54  | Q3ZBW4<br>(PCNA_BOVIN)  | 71/6              | 20%          | <b>Proliferating cell<br/>nuclear antigen</b> | <b>Plasma proteins,</b><br>Predicted intracellular<br>proteins,<br>Disease related genes,<br>Cancer-related genes,                          | <b>INTRACELLULAR</b><br>(nucleus)                  | Chromatin<br>binding<br>DNA binding                                                           | DNA<br>replication<br>DNA repair                         |
| b55  | Q0V8H6<br>(MOV10_BOVIN) | 68/10             | 12%          | <b>Putative helicase MOV-<br/>10</b>          | <b>Plasma proteins,</b><br>Predicted intracellular<br>proteins,<br>Enzymes,                                                                 | <b>INTRACELLULAR</b><br>(cytosol)                  | ATP binding<br>Helicase<br>activity<br>RNA binding                                            | miRNA-<br>mediated<br>gene silencing<br>mRNA<br>cleavage |
| b57  | P81425                  | 97/11             | 13%          | <b>Dipeptidyl peptidase 4</b>                 | <b>Plasma proteins,</b>                                                                                                                     | <b>INTRACELLULAR</b>                               | Catalytic                                                                                     | Cell adhesion                                            |

| SPOT | UniProt ID <sup>u</sup> | SCORE/<br>MATCHES | SEQ.<br>COV. | PROTEIN                                | PROTEIN CLASS <sup>p</sup>                                                                                                                      | LOCALIZATION <sup>u</sup>                             | MOLECULAR<br>FUNCTION <sup>u</sup>            | BIOLOGICAL<br>PROCESS <sup>u</sup>                                                |
|------|-------------------------|-------------------|--------------|----------------------------------------|-------------------------------------------------------------------------------------------------------------------------------------------------|-------------------------------------------------------|-----------------------------------------------|-----------------------------------------------------------------------------------|
|      | (DPP4_BOVIN)            |                   |              |                                        | Predicted intracellular proteins,<br>Predicted membrane proteins,<br>Enzymes,<br>FDA approved drug targets,<br>CD markers,                      | (cell membrane)<br><b>EXTRACELLULAR</b><br>(secreted) | activity<br>Signalling<br>receptor<br>binding | Endothelial<br>cell migration<br>T-cell<br>costimulation                          |
| b58  | B2D1U1<br>(CBG_URSAR)   | 73/6              | 21%          | <b>Corticosteroid-binding globulin</b> | <b>Plasma proteins,</b><br>Predicted secreted proteins,<br>Disease related genes,                                                               | <b>EXTRACELLULAR</b><br>(secreted)                    | Steroid binding                               | Transport                                                                         |
| b60  | P82533<br>(CRYAA_ERIEU) | 61/3              | 14%          | <b>Alpha-crystallin A chain</b>        | <b>Plasma proteins,</b><br>Predicted intracellular proteins,<br>Disease related genes,                                                          | <b>INTRACELLULAR</b><br>(nucleus, cytosol)            | Metal ion binding<br>Eye lens structure       | Eye lens structure                                                                |
| b61  | O46375<br>(TTHY_BOVIN)  | 80/4              | 46%          | <b>Transthyretin</b>                   | <b>Plasma proteins,</b><br>Predicted secreted proteins,<br>Disease related genes,<br>Cancer-related genes,                                      | <b>EXTRACELLULAR</b><br>(Secreted)                    | Hormone activity<br>Thyroid hormone binding   | Thyroid hormone transport                                                         |
| b62  | P15497<br>(APOA1_BOVIN) | 245/22            | 68%          | <b>Apolipoprotein A-I</b>              | <b>Plasma proteins,</b><br>Predicted secreted proteins,<br>Predicted intracellular proteins,<br>Disease related genes,<br>Cancer-related genes, | <b>EXTRACELLULAR</b><br>(secreted)                    | Lipid binding                                 | Cholesterol metabolism & transport<br>Lipid metabolism & transport<br>Lipoprotein |

| SPOT | UniProt ID <sup>u</sup> | SCORE/<br>MATCHES | SEQ.<br>COV. | PROTEIN                         | PROTEIN CLASS <sup>p</sup>                                                                                                                                                                 | LOCALIZATION <sup>u</sup>                              | MOLECULAR<br>FUNCTION <sup>u</sup> | BIOLOGICAL<br>PROCESS <sup>u</sup>                                                                  |
|------|-------------------------|-------------------|--------------|---------------------------------|--------------------------------------------------------------------------------------------------------------------------------------------------------------------------------------------|--------------------------------------------------------|------------------------------------|-----------------------------------------------------------------------------------------------------|
|      |                         |                   |              |                                 | Candidate cardiovascular disease genes,                                                                                                                                                    |                                                        |                                    | metabolic process                                                                                   |
| b63  | P15497<br>(APOA1_BOVIN) | 252/22            | 60%          | <b>Apolipoprotein A-I</b>       | <b>Plasma proteins,</b><br>Predicted secreted proteins,<br>Predicted intracellular proteins,<br>Disease related genes,<br>Cancer-related genes,<br>Candidate cardiovascular disease genes, | <b>EXTRACELLULAR</b><br>(secreted)                     | Lipid binding                      | Cholesterol metabolism & transport<br>Lipid metabolism & transport<br>Lipoprotein metabolic process |
| b64  | P15497<br>(APOA1_BOVIN) | 147/16            | 52%          | <b>Apolipoprotein A-I</b>       | <b>Plasma proteins,</b><br>Predicted secreted proteins,<br>Predicted intracellular proteins,<br>Disease related genes,<br>Cancer-related genes,<br>Candidate cardiovascular disease genes, | <b>EXTRACELLULAR</b><br>(secreted)                     | Lipid binding                      | Cholesterol metabolism & transport<br>Lipid metabolism & transport<br>Lipoprotein metabolic process |
| b30  | P10522<br>(MYP0_BOVIN)  | 86/8              | 21%          | <b>Myelin protein P0</b>        | <b>Predicted membrane proteins ,</b><br>Predicted intracellular proteins,<br>Disease related genes,                                                                                        | <b>INTRACELLULAR</b><br>(cell membrane, myelin sheath) | Unknown                            | Cell aggregation<br>Cell-to-cell adhesion<br>Myelination                                            |
| b33  | Q2HJB9<br>(TMM98_BOVIN) | 90/6              | 30%          | <b>Transmembrane protein 98</b> | <b>Predicted membrane proteins,</b><br>Disease related genes,                                                                                                                              | <b>INTRACELLULAR</b><br>(cell membrane)                | Unknown                            | Unknown                                                                                             |

| SPOT | UniProt ID <sup>u</sup>     | SCORE/<br>MATCHES | SEQ.<br>COV. | PROTEIN                                                      | PROTEIN CLASS <sup>p</sup>                       | LOCALIZATION <sup>u</sup>                        | MOLECULAR<br>FUNCTION <sup>u</sup>                                           | BIOLOGICAL<br>PROCESS <sup>u</sup>                                                 |
|------|-----------------------------|-------------------|--------------|--------------------------------------------------------------|--------------------------------------------------|--------------------------------------------------|------------------------------------------------------------------------------|------------------------------------------------------------------------------------|
| b25  | A1A4L4<br>(MINY4_BOVIN)     | 92/11             | 15%          | Probable ubiquitin<br>carboxyl-terminal<br>hydrolase MINDY-4 | Predicted intracellular<br>proteins,<br>Enzymes, | INTRACELLULAR<br>(cytosol, cell<br>membrane)     | Thiol-<br>dependent<br>ubiquitinyl<br>hydrolase<br>activity                  | Ubiquitin<br>conjugation<br>pathway                                                |
| b26  | Q5E9F9<br>(PRS7_BOVIN)      | 60/13             | 33%          | 26S proteasome<br>regulatory subunit 7                       | Predicted intracellular<br>proteins,             | INTRACELLULAR<br>(nucleus, cytosol)              | Proteasome-<br>activating<br>ATPase<br>activity<br>ATP binding               | Ubiquitin-<br>dependent<br>protein<br>catabolic<br>pathway                         |
| b27  | Q0VBY1<br>(ODF2L_BOVIN)     | 63/9              | 18%          | Outer dense fiber<br>protein 2-like                          | Predicted intracellular<br>proteins,             | INTRACELLULAR<br>(cytosol,<br>mitochondrion)     | unknown                                                                      | Cell projection<br>organization<br>Negative<br>regulation of<br>cilium<br>assembly |
| b53  | Q0VBY1<br>(ODF2L_BOVIN)     | 76/7              | 17%          | Outer dense fiber<br>protein 2-like                          | Predicted intracellular<br>proteins,             | INTRACELLULAR<br>(cytosol,<br>mitochondrion)     | unknown                                                                      | Cell projection<br>organization<br>Negative<br>regulation of<br>cilium<br>assembly |
| b29  | Q2MJS5<br>(MT3_BOSMU<br>)   | 59/4              | 72%          | Metallothionein-3                                            | Predicted intracellular<br>proteins,             | INTRACELLULAR<br>(nucleus, synaptic<br>vesicles) | Heavy metals<br>ion binding<br>Drug binding<br>Protein<br>kinase<br>activity | Astrocyte<br>development<br>Heavy ions<br>homeostasis                              |
| b43  | Q5E977<br>(F118B_BOVIN<br>) | 75/8              | 14%          | Protein FAM118B                                              | Predicted intracellular<br>proteins,             | INTRACELLULAR<br>(nucleus)                       | Unknown                                                                      | Cajal body<br>organization                                                         |

| SPOT | UniProt ID <sup>u</sup>     | SCORE/<br>MATCHES | SEQ.<br>COV. | PROTEIN                                                          | PROTEIN CLASS <sup>p</sup>                                                                                    | LOCALIZATION <sup>u</sup>                                         | MOLECULAR<br>FUNCTION <sup>u</sup>                                         | BIOLOGICAL<br>PROCESS <sup>u</sup>                                                                                                                                                         |
|------|-----------------------------|-------------------|--------------|------------------------------------------------------------------|---------------------------------------------------------------------------------------------------------------|-------------------------------------------------------------------|----------------------------------------------------------------------------|--------------------------------------------------------------------------------------------------------------------------------------------------------------------------------------------|
| b44  | A5PK00<br>(VPS36_BOVIN<br>) | 104/10            | 32%          | <b>Vacuolar protein-<br/>sorting-associated<br/>protein 36</b>   | <b>Predicted intracellular<br/>proteins,</b>                                                                  | <b>INTRACELLULAR</b><br>(nucleus,<br>endosome in<br>most tissues) | Lipid binding<br>Ubiquitin<br>binding                                      | Protein<br>transport<br>Transcription<br>Regulation of<br>transcription                                                                                                                    |
| b46  | P46446<br>(ACY2_BOVIN)      | 72/7              | 20%          | <b>Aspartoacylase</b>                                            | <b>Predicted intracellular<br/>proteins,</b><br>Disease related genes,<br>Enzymes,<br>Potential drug targets, | <b>INTRACELLULAR</b><br>(nucleus, cytosol)                        | Metal ion<br>binding<br>Hydrolase<br>activity                              | Metabolic<br>process                                                                                                                                                                       |
| b47  | Q5E9B4<br>(EI2BB_BOVIN<br>) | 81/8              | 23%          | <b>Translation initiation<br/>factor eIF-2B subunit<br/>beta</b> | <b>Predicted intracellular<br/>proteins,</b><br>Disease related genes,                                        | <b>INTRACELLULAR</b><br>(cytosol)                                 | ATP, GTP<br>binding<br>Translation<br>initiation<br>factor<br>activity     | Central<br>nervous<br>system<br>development<br>Myelination<br>Ovarian<br>development<br>T-cell receptor<br>signalling<br>pathway<br>Translation<br>initiation<br>(protein<br>biosynthesis) |
| b48  | Q3ZC08<br>(ANXA9_BOVI<br>N) | 95/8              | 31%          | <b>Annexin A9</b>                                                | <b>Predicted intracellular<br/>proteins,</b>                                                                  | <b>INTRACELLULAR</b><br>(cell membrane,<br>cytosol)               | Calcium ion<br>binding<br>Calcium-<br>dependent<br>phospholipid<br>binding | Low affinity<br>receptor for<br>acetylcholine                                                                                                                                              |
| b52  | Q2T9L9                      | 60/4              | 14%          | <b>General transcription</b>                                     | <b>Predicted intracellular</b>                                                                                | <b>INTRACELLULAR</b>                                              | ATP binding                                                                | Transcription                                                                                                                                                                              |

| SPOT | UniProt ID <sup>u</sup> | SCORE/<br>MATCHES | SEQ.<br>COV. | PROTEIN                                          | PROTEIN CLASS <sup>p</sup>                               | LOCALIZATION <sup>u</sup>         | MOLECULAR<br>FUNCTION <sup>u</sup>                                   | BIOLOGICAL<br>PROCESS <sup>u</sup>                |
|------|-------------------------|-------------------|--------------|--------------------------------------------------|----------------------------------------------------------|-----------------------------------|----------------------------------------------------------------------|---------------------------------------------------|
|      | (T2FB_BOVIN)            |                   |              | <b>factor IIF subunit 2</b>                      | <b>proteins,</b><br>Enzymes,                             | (nucleus)                         | DNA binding<br>Helicase<br>activity                                  | regulation<br>Transcription<br>initiation         |
| b55  | Q32L18<br>(BTBDG_BOVIN) | 94/9              | 23%          | <b>BTB/POZ domain-<br/>containing protein 16</b> | <b>Predicted intracellular<br/>proteins,</b>             | <b>INTRACELLULAR</b><br>(nucleus) | Unknown                                                              | Unknown                                           |
| b60  | A4FV72<br>(PPIE_BOVIN)  | 73/6              | 13%          | <b>Peptidyl-prolyl cis-trans<br/>isomerase E</b> | <b>Predicted intracellular<br/>proteins,</b><br>Enzymes, | <b>INTRACELLULAR</b><br>(nucleus) | Cyclosporin<br>A binding<br>mRNA<br>binding<br>Catalytic<br>activity | mRNA splicing<br>Protein folding<br>Isomerisation |

<sup>u</sup> – data obtained from <https://www.uniprot.org/>

<sup>p</sup> – data obtained from <https://www.proteinatlas.org/>

Matches - the number of peptides in the MS spectrum that match the sequences from the database.

SEQ COV = sequence coverage - what percentage of the protein found in the study is covered by peptides from the MS spectrum.
