# Supplementary material for: Comparative Analysis of Saliva and Plasma Proteins Patterns in Pregnant Cows—Preliminary Studies
Source: MDPI journal article supplement (doi:10.3390/ani12202850), 2022-10-20
Supplement: s1 [file s1]

| SPOT | UniProt ID <sup>u</sup>     | SCORE/<br>MATCHES | SEQ.<br>COV. | PROTEIN                                            | PROTEIN CLASS <sup>p</sup>                                                                                                                                                   | LOCALIZATION <sup>u</sup>                          | MOLECULAR<br>FUNCTION <sup>u</sup>                                                 | BIOLOGICAL<br>PROCESS <sup>u</sup>           |
|------|-----------------------------|-------------------|--------------|----------------------------------------------------|------------------------------------------------------------------------------------------------------------------------------------------------------------------------------|----------------------------------------------------|------------------------------------------------------------------------------------|----------------------------------------------|
| a1   | P02111<br>(HBB_ORNAN)       | 94/6              | 60%          | <b>Hemoglobin subunit beta</b>                     | <b>Plasma proteins,</b><br>Predicted intracellular<br>proteins,<br>Transporters,<br>Disease related genes,<br>FDA approved drug<br>targets                                   | <b>INTRACELLULAR</b><br>(cytosol,<br>erythrocytes) | Heme binding<br>Metal ion binding<br>Oxygen binding<br>Oxygen carrier<br>activity  | Oxygen<br>transport<br>Transport             |
| a3   | P0DM93<br>(APOA2_LEPW<br>E) | 56/4              | 38%          | <b>Apolipoprotein A-II</b>                         | <b>Plasma proteins,</b><br>Predicted secreted<br>proteins,<br>Predicted intracellular<br>proteins,<br>Cancer-related genes,<br>Candidate<br>cardiovascular disease<br>genes, | <b>EXTRACELLULAR</b><br>(secreted)                 | Lipid binding                                                                      | Lipid transport<br>Lipoprotein<br>metabolism |
| a9   | Q9GK13<br>(MUTA_BOVIN<br>)  | 60/6              | 18%          | <b>Methylmalonyl-CoA<br/>mutase, mitochondrial</b> | <b>Plasma proteins,</b><br>Predicted intracellular<br>proteins,<br>Disease related genes,<br>Enzymes,<br>FDA approved drug<br>targets                                        | <b>INTRACELLULAR</b><br>(mitochondrion<br>matrix)  | GTPase activity<br>Cobalamin<br>binding<br>Metal ion binding<br>Catalytic activity | Isomerase<br>Metabolism                      |
| a16  | Q9GK13<br>(MUTA_BOVIN<br>)  | 88/10             | 21%          | <b>Methylmalonyl-CoA<br/>mutase, mitochondrial</b> | <b>Plasma proteins,</b><br>Predicted intracellular<br>proteins,<br>Disease related genes,<br>Enzymes,<br>FDA approved drug<br>targets                                        | <b>INTRACELLULAR</b><br>(mitochondrion<br>matrix)  | GTPase activity<br>Cobalamin<br>binding<br>Metal ion binding<br>Catalytic activity | Isomerase<br>Metabolism                      |

| SPOT | UniProt ID <sup>u</sup> | SCORE/<br>MATCHES | SEQ.<br>COV. | PROTEIN                                               | PROTEIN CLASS <sup>p</sup>                                                                                                                                                                 | LOCALIZATION <sup>u</sup>                       | MOLECULAR<br>FUNCTION <sup>u</sup>                                              | BIOLOGICAL<br>PROCESS <sup>u</sup>                                                                  |
|------|-------------------------|-------------------|--------------|-------------------------------------------------------|--------------------------------------------------------------------------------------------------------------------------------------------------------------------------------------------|-------------------------------------------------|---------------------------------------------------------------------------------|-----------------------------------------------------------------------------------------------------|
| a42  | Q9GK13<br>(MUTA_BOVIN)  | 102/8             | 26%          | <b>Methylmalonyl-CoA mutase, mitochondrial</b>        | <b>Plasma proteins,</b><br>Predicted intracellular proteins,<br>Disease related genes,<br>Enzymes,<br>FDA approved drug targets                                                            | <b>INTRACELLULAR</b><br>(mitochondrion matrix)  | GTPase activity<br>Cobalamin binding<br>Metal ion binding<br>Catalytic activity | Isomerase<br>Metabolism                                                                             |
| a11  | Q3ZCI9<br>(TCPQ_BOVIN)  | 85/9              | 20%          | <b>T-complex protein 1 subunit theta</b>              | <b>Plasma proteins,</b><br>Predicted intracellular proteins                                                                                                                                | <b>INTRACELLULAR</b><br>(cytoskeleton, cytosol) | ATP binding<br>Unfolded protein binding                                         | Protein folding                                                                                     |
| a13  | Q3ZCI9<br>(TCPQ_BOVIN)  | 71/9              | 25%          | <b>T-complex protein 1 subunit theta</b>              | <b>Plasma proteins,</b><br>Predicted intracellular proteins                                                                                                                                | <b>INTRACELLULAR</b><br>(cytoskeleton, cytosol) | ATP binding<br>Unfolded protein binding                                         | Protein folding                                                                                     |
| a12  | Q0V8H6<br>(MOV10_BOVIN) | 82/11             | 13%          | <b>Putative helicase MOV-10</b>                       | <b>Plasma proteins,</b><br>Predicted intracellular proteins,<br>Enzymes,                                                                                                                   | <b>INTRACELLULAR</b><br>(cytosol)               | ATP binding<br>Helicase activity<br>RNA binding                                 | miRNA-mediated gene silencing<br>mRNA cleavage                                                      |
| a14  | M3XYN3<br>(APOA1_MUSPF) | 67/4              | 19%          | <b>Apolipoprotein A-I</b>                             | <b>Plasma proteins,</b><br>Predicted secreted proteins,<br>Predicted intracellular proteins,<br>Disease related genes,<br>Cancer-related genes,<br>Candidate cardiovascular disease genes, | <b>EXTRACELLULAR</b><br>(secreted)              | Lipid binding                                                                   | Cholesterol metabolism & transport<br>Lipid metabolism & transport<br>Lipoprotein metabolic process |
| a17  | A4FUD9<br>(MCM3_BOVIN)  | 86/10             | 19%          | <b>Minichromosome maintenance complex component 3</b> | <b>Plasma proteins,</b><br>Predicted intracellular proteins,<br>Cancer-related genes,                                                                                                      | <b>INTRACELLULAR</b><br>(nucleus)               | ATP binding<br>DNA binding<br>Helicase activity                                 | Cell cycle<br>DNA replication initiation                                                            |

| SPOT | UniProt ID <sup>u</sup>     | SCORE/<br>MATCHES | SEQ.<br>COV. | PROTEIN                                                  | PROTEIN CLASS <sup>p</sup>                                                                                                                                        | LOCALIZATION <sup>u</sup>                         | MOLECULAR<br>FUNCTION <sup>u</sup>                                        | BIOLOGICAL<br>PROCESS <sup>u</sup>                                                         |
|------|-----------------------------|-------------------|--------------|----------------------------------------------------------|-------------------------------------------------------------------------------------------------------------------------------------------------------------------|---------------------------------------------------|---------------------------------------------------------------------------|--------------------------------------------------------------------------------------------|
|      |                             |                   |              |                                                          | Enzymes,                                                                                                                                                          |                                                   |                                                                           |                                                                                            |
| a19  | P11974<br>(KPYM_RABIT)      | 90/8              | 19%          | <b>Pyruvate kinase PKM</b>                               | <b>Plasma proteins,</b><br>Predicted intracellular<br>proteins,<br>Cancer-related genes,<br>Enzymes,                                                              | <b>INTRACELLULAR</b><br>(cytosol)                 | Kinase activity<br>ATP binding<br>Magnesium &<br>potassium ion<br>binding | Glycolysis                                                                                 |
| a20  | P08907<br>(AATM_HORSE<br>)  | 59/13             | 27%          | <b>Aspartate<br/>aminotransferase,<br/>mitochondrial</b> | <b>Plasma proteins,</b><br>Predicted secreted<br>proteins,<br>Enzymes,<br>Transporters,<br>Cancer-related genes,<br>Candidate<br>cardiovascular disease<br>genes, | <b>INTRACELLULAR</b><br>(mitochondrion<br>matrix) | Transferase<br>activity<br>Pyridoxal<br>phosphate<br>binding              | Aspartate<br>metabolic<br>process<br>Biosynthetic<br>process                               |
| a22  | Q6UR05<br>(MRP1_CANLF<br>)  | 99/15             | 12%          | <b>Multidrug resistance-<br/>associated protein 1</b>    | <b>Plasma proteins,</b><br>Predicted membrane<br>proteins,<br>Cancer-related genes,<br>Transporters,<br>FDA approved drug<br>targets,                             | <b>INTRACELLULAR</b><br>(cell membrane)           | ATP binding<br>ATPase activity<br>Transporter<br>activity                 | Drug/Xenobiotic<br>transmembrane<br>transport<br>Glutathione<br>transmembrane<br>transport |
| a31  | P07318<br>(CRBB1_BOVI<br>N) | 76/7              | 30%          | <b>Beta-crystallin B1</b>                                | <b>Plasma proteins,</b><br>Predicted intracellular<br>proteins,<br>Disease related genes,                                                                         | <b>INTRACELLULAR</b>                              | Structural<br>constituent of eye<br>lens                                  | Visual<br>perception                                                                       |
| a57  | E1BPX4<br>(MCM8_BOVI<br>N)  | 85/9              | 16%          | <b>DNA helicase MCM8</b>                                 | <b>Plasma proteins,</b><br>Predicted intracellular<br>proteins,<br>Enzymes,                                                                                       | <b>INTRACELLULAR</b><br>(nucleus)                 | ATP binding<br>DNA binding<br>Helicase activity                           | Cell cycle<br>Initiation of<br>replication<br>DNA repair                                   |

| SPOT | UniProt ID <sup>u</sup> | SCORE/<br>MATCHES | SEQ.<br>COV. | PROTEIN                        | PROTEIN CLASS <sup>p</sup>                                                                                                                                                                             | LOCALIZATION <sup>u</sup>          | MOLECULAR<br>FUNCTION <sup>u</sup>  | BIOLOGICAL<br>PROCESS <sup>u</sup>                           |
|------|-------------------------|-------------------|--------------|--------------------------------|--------------------------------------------------------------------------------------------------------------------------------------------------------------------------------------------------------|------------------------------------|-------------------------------------|--------------------------------------------------------------|
|      |                         |                   |              |                                | Disease related genes,<br>Potential drug targets,                                                                                                                                                      |                                    |                                     | Gamete<br>generation                                         |
| a59  | P02769<br>(ALBU_BOVIN)  | 83/16             | 30%          | <b>Serum albumin</b>           | <b>Plasma proteins,</b><br>Predicted secreted<br>proteins,<br>Predicted intracellular<br>proteins,<br>Cancer-related genes,<br>Candidate<br>cardiovascular disease<br>genes,<br>Disease related genes, | <b>EXTRACELLULAR</b><br>(secreted) | Substance<br>binding &<br>transport | Blood transport<br>Oncotic<br>pressure<br>maintance          |
| a60  | P02769<br>(ALBU_BOVIN)  | 78/17             | 28%          | <b>Serum albumin</b>           | <b>Plasma proteins,</b><br>Predicted secreted<br>proteins,<br>Predicted intracellular<br>proteins,<br>Cancer-related genes,<br>Candidate<br>cardiovascular disease<br>genes,<br>Disease related genes, | <b>EXTRACELLULAR</b><br>(secreted) | Substance<br>binding &<br>transport | Blood transport<br>Oncotic<br>pressure<br>maintance          |
| a25  | P07435<br>(OBP_BOVIN)   | 60/6              | 44%          | <b>Odorant-binding protein</b> | <b>Predicted secreted<br/>proteins,</b>                                                                                                                                                                | <b>EXTRACELLULAR</b><br>(secreted) | Small molecule<br>binding           | Response to<br>stimulus<br>Sensory<br>perception of<br>smell |
| a33  | P07435<br>(OBP_BOVIN)   | 69/10             | 55%          | <b>Odorant-binding protein</b> | <b>Predicted secreted<br/>proteins,</b>                                                                                                                                                                | <b>EXTRACELLULAR</b><br>(secreted) | Small molecule<br>binding           | Response to<br>stimulus<br>Sensory<br>perception of          |

| SPOT | UniProt ID <sup>u</sup> | SCORE/<br>MATCHES | SEQ.<br>COV. | PROTEIN                                                                 | PROTEIN CLASS <sup>p</sup>                                                         | LOCALIZATION <sup>u</sup>                                                       | MOLECULAR<br>FUNCTION <sup>u</sup>                                      | BIOLOGICAL<br>PROCESS <sup>u</sup>                                                                             |
|------|-------------------------|-------------------|--------------|-------------------------------------------------------------------------|------------------------------------------------------------------------------------|---------------------------------------------------------------------------------|-------------------------------------------------------------------------|----------------------------------------------------------------------------------------------------------------|
|      |                         |                   |              |                                                                         |                                                                                    |                                                                                 |                                                                         | smell                                                                                                          |
| a45  | P79124<br>(SPL2A_BOVIN) | 65/10             | 61%          | Short palate, lung and nasal epithelium carcinoma-associated protein 2A | Predicted secreted proteins,                                                       | EXTRACELLULAR<br>(secreted)                                                     | Lipid binding                                                           | Unknown                                                                                                        |
| a47  | Q1LZC5<br>(ANR54_BOVIN) | 70/7              | 15%          | Ankyrin repeat domain-containing protein 54                             | Predicted secreted proteins,<br>Predicted intracellular proteins,                  | INTRACELLULAR<br>(cytosol, nucleus, secreted)                                   | Protein-containing complex binding<br>Protein kinase regulator activity | Nucleo-cytoplasmic transport<br>Regulation of erythrocyte differentiation<br>Intracellular signal transduction |
| a56  | P80025<br>(PERL_BOVIN)  | 83/10             | 14%          | Lactoperoxidase                                                         | Predicted secreted proteins,<br>Predicted intracellular proteins,<br>Enzymes,      | EXTRACELLULAR<br>(milk, saliva)<br>INTRACELLULAR<br>(cytosol of salivary gland) | Calcium ion binding<br>Heme binding<br>Thiocyanate peoxidase activity   | Antibacterial humoral response<br>Response to oxidative stress<br>Sensory perception                           |
| a12  | Q2HJ63<br>(CAHM2_BOVIN) | 72/7              | 28%          | Calcium homeostasis modulator protein 2                                 | Predicted membrane proteins,<br>Transporters,                                      | INTRACELLULAR<br>(cell membrane)                                                | Cation channel activity                                                 | Ion transmembrane transport                                                                                    |
| a18  | Q01888<br>(GDC_BOVIN)   | 84/8              | 26%          | Graves disease carrier protein                                          | Predicted membrane proteins,<br>Predicted intracellular proteins,<br>Transporters, | INTRACELLULAR<br>(mitochondrion inner membrane)                                 | Transmembrane transporter activity                                      | Mitochondrial transport                                                                                        |
| a26  | Q29RT8                  | 60/4              | 17%          | Phospholipid                                                            | Predicted membrane                                                                 | INTRACELLULAR                                                                   | Lipid phosphatase                                                       | Phospholipid                                                                                                   |

| SPOT | UniProt ID <sup>u</sup> | SCORE/<br>MATCHES | SEQ.<br>COV. | PROTEIN                                                            | PROTEIN CLASS <sup>p</sup>                                                                                | LOCALIZATION <sup>u</sup>                                                                                        | MOLECULAR<br>FUNCTION <sup>u</sup>                                                                      | BIOLOGICAL<br>PROCESS <sup>u</sup>                                          |
|------|-------------------------|-------------------|--------------|--------------------------------------------------------------------|-----------------------------------------------------------------------------------------------------------|------------------------------------------------------------------------------------------------------------------|---------------------------------------------------------------------------------------------------------|-----------------------------------------------------------------------------|
|      | (PLPR2_BOVIN)           |                   |              | <b>phosphatase-related protein type 2</b>                          | <b>proteins,</b><br>Enzymes,                                                                              | (cell membrane)                                                                                                  | activity<br>Phosphatide<br>phosphatase<br>activity                                                      | dephosphorylation<br>Phospholipid<br>metabolism<br>Signal<br>transduction   |
| a41  | Q95L74<br>(CY24B_BISBI) | 75/8              | 18%          | <b>Cytochrome b-245 heavy chain</b>                                | <b>Predicted membrane proteins,</b><br>Transporters,<br>Disease related genes,<br>Potential drug targets, | <b>INTRACELLULAR</b><br>(plasma<br>membrane in<br>subsets of<br>immune cells)                                    | Metal ion binding<br>Oxidoreductase<br>activity<br>Voltage-gated ion<br>channel activity                | Immune<br>response<br>Transmembrane<br>transport<br>(ions and<br>electrons) |
| a50  | Q7YS88<br>(RAMP3_PIG)   | 84/7              | 17%          | <b>Receptor activity-modifying protein 3</b>                       | <b>Predicted membrane proteins,</b><br>FDA approved drug<br>targets,                                      | <b>INTRACELLULAR</b><br>(cell membrane)                                                                          | Protein<br>transporter<br>activity                                                                      | Receptor<br>Intracellular<br>protein<br>transport                           |
| a2   | A4IFI1<br>(CC157_BOVIN) | 97/9              | 19%          | <b>Coiled-coil domain-containing protein 157</b>                   | <b>Predicted intracellular proteins,</b>                                                                  | <b>INTRACELLULAR</b>                                                                                             | Unknown                                                                                                 | Unknown                                                                     |
| a8   | A4IFI1<br>(CC157_BOVIN) | 133/13            | 23%          | <b>Coiled-coil domain-containing protein 157</b>                   | <b>Predicted intracellular proteins,</b>                                                                  | <b>INTRACELLULAR</b>                                                                                             | Unknown                                                                                                 | Unknown                                                                     |
| a21  | A4IFI1<br>(CC157_BOVIN) | 65/8              | 14%          | <b>Coiled-coil domain-containing protein 157</b>                   | <b>Predicted intracellular proteins,</b>                                                                  | <b>INTRACELLULAR</b>                                                                                             | Unknown                                                                                                 | Unknown                                                                     |
| a4   | Q29460<br>(PA1B3_BOVIN) | 66/6              | 23%          | <b>Platelet-activating factor acetylhydrolase IB subunit gamma</b> | <b>Predicted intracellular proteins,</b><br>Enzymes,                                                      | <b>INTRACELLULAR</b><br>(cytoplasmic and<br>membranous<br>expression in<br>several tissues,<br>including subsets | Esterase activity<br>Identical protein<br>binding<br>Platelet-activating<br>factor<br>acetyltransferase | Brain<br>development<br>Lipid catabolic<br>process<br>Spermatogenesis       |

| SPOT | UniProt ID <sup>u</sup> | SCORE/<br>MATCHES | SEQ.<br>COV. | PROTEIN                                                          | PROTEIN CLASS <sup>p</sup>                                                   | LOCALIZATION <sup>u</sup>                   | MOLECULAR<br>FUNCTION <sup>u</sup>                     | BIOLOGICAL<br>PROCESS <sup>u</sup>                                |
|------|-------------------------|-------------------|--------------|------------------------------------------------------------------|------------------------------------------------------------------------------|---------------------------------------------|--------------------------------------------------------|-------------------------------------------------------------------|
|      |                         |                   |              |                                                                  |                                                                              | of immune cells)                            | activity                                               |                                                                   |
| a6   | Q2TBL4<br>(RPC3_BOVIN)  | 84/9              | 27%          | <b>DNA-directed RNA polymerase III subunit RPC3</b>              | <b>Predicted intracellular proteins,</b><br>RNA polymerase related proteins, | <b>INTRACELLULAR</b><br>(nucleus)           | RNA polymerase activity<br>Single-stranded DNA binding | Transcription<br>Immune response                                  |
| a7   | Q29RJ2<br>(TBC24_BOVIN) | 73/6              | 21%          | <b>TBC1 domain family member 24</b>                              | <b>Predicted intracellular proteins,</b><br>Disease related genes,           | <b>INTRACELLULAR</b><br>(cytosol)           | GTPase activation                                      | Unknown                                                           |
| a10  | P79106<br>(PAFA2_BOVIN) | 74/9              | 22%          | <b>Platelet-activating factor acetylhydrolase 2, cytoplasmic</b> | <b>Predicted intracellular proteins,</b><br>Enzymes,                         | <b>INTRACELLULAR</b><br>(ER membrane)       | Esterase activity                                      | Lipid catabolic process                                           |
| a13  | P79106<br>(PAFA2_BOVIN) | 78/8              | 23%          | <b>Platelet-activating factor acetylhydrolase 2, cytoplasmic</b> | <b>Predicted intracellular proteins,</b><br>Enzymes,                         | <b>INTRACELLULAR</b><br>(ER membrane)       | Esterase activity                                      | Lipid catabolic process                                           |
| a15  | Q0VC16<br>(TGO1_BOVIN)  | 60/13             | 8%           | <b>Transport and Golgi organization protein 1 homolog</b>        | <b>Predicted intracellular proteins,</b>                                     | <b>INTRACELLULAR</b><br>(ER membrane)       | Lipoprotein transporter activity                       | ER-Golgi transport (lipoprotein, protein transport)<br>Exocytosis |
| a23  | O97557<br>(TUFT1_PIG)   | 58/11             | 47%          | <b>Tuftelin</b>                                                  | <b>Predicted intracellular proteins,</b>                                     | <b>INTRACELLULAR</b><br>(cytosol, secreted) | Unknown                                                | Biom mineralization<br>Biom mineral tissue development            |
| a24  | Q32KZ9<br>(TEKT1_BOVIN) | 112/11            | 35%          | <b>Tektin-1</b>                                                  | <b>Predicted intracellular proteins,</b>                                     | <b>INTRACELLULAR</b><br>(cytoskeleton)      | Unknown                                                | Cilium assembly<br>Cilium movement involved in cell motility      |

| SPOT | UniProt ID <sup>u</sup> | SCORE/<br>MATCHES | SEQ.<br>COV. | PROTEIN                                                                         | PROTEIN CLASS <sup>p</sup>                                         | LOCALIZATION <sup>u</sup>                                                        | MOLECULAR<br>FUNCTION <sup>u</sup>                                                                                | BIOLOGICAL<br>PROCESS <sup>u</sup>                                                        |
|------|-------------------------|-------------------|--------------|---------------------------------------------------------------------------------|--------------------------------------------------------------------|----------------------------------------------------------------------------------|-------------------------------------------------------------------------------------------------------------------|-------------------------------------------------------------------------------------------|
|      |                         |                   |              |                                                                                 |                                                                    |                                                                                  |                                                                                                                   | Flagellated sperm motility                                                                |
| a27  | Q17R01<br>(FXL14_BOVIN) | 62/6              | 33%          | <b>F-box/LRR-repeat protein 14</b>                                              | <b>Predicted intracellular proteins,</b>                           | <b>INTRACELLULAR</b><br>(cytosol)                                                | Ubiquitin-protein transferase activity                                                                            | Ubiquitin-dependent protein catabolic process                                             |
| a28  | A4FUG8<br>(RAB2_BOVIN)  | 78/9              | 19%          | <b>Rab GTPase-binding effector protein 2 (Rabaptin)</b>                         | <b>Predicted intracellular proteins,</b>                           | <b>INTRACELLULAR</b><br>(endosome, cytosol)                                      | Growth factor activity<br>GTPase activator activity                                                               | Endocytosis<br>Protein transport                                                          |
| a32  | A5D7B1<br>(RSAD1_BOVIN) | 79/9              | 25%          | <b>Radical S-adenosyl methionine domain-containing protein 1, mitochondrial</b> | <b>Predicted intracellular proteins,</b>                           | <b>INTRACELLULAR</b><br>(mitochondrion)                                          | Metal ion binding<br>Oxidoreductase activity                                                                      | Porphyrin-containing compound biosynthesis                                                |
| a37  | Q1JQ97<br>(BBS4_BOVIN)  | 70/7              | 20%          | <b>Bardet-Biedl syndrome 4 protein homolog</b>                                  | <b>Predicted intracellular proteins,</b><br>Disease related genes, | <b>INTRACELLULAR</b><br>(cytoskeleton, cell membrane, cytosol of lymphoid cells) | Alpha & beta tubulin binding<br>Dynactin binding<br>Microtubule motor activity                                    | Cilium biogenesis/degradation<br>Protein transport                                        |
| a38  | P13214<br>(ANXA4_BOVIN) | 64/14             | 46%          | <b>Annexin A4</b>                                                               | <b>Predicted intracellular proteins,</b><br>Cancer-related genes,  | <b>INTRACELLULAR</b><br>(cell membrane, cytosol, nucleus of epithelial tissues)  | Calcium-dependent protein & phospholipid binding<br>Calcium ion binding<br>Carbohydrate, chondroitin sulphate and | Epithelial cell differentiation<br>Notch signaling pathway<br>Regulation of transcription |



| SPOT | UniProt ID <sup>u</sup> | SCORE/<br>MATCHES | SEQ.<br>COV. | PROTEIN                                                | PROTEIN CLASS <sup>p</sup>               | LOCALIZATION <sup>u</sup>                  | MOLECULAR<br>FUNCTION <sup>u</sup>                                                    | BIOLOGICAL<br>PROCESS <sup>u</sup>                                |
|------|-------------------------|-------------------|--------------|--------------------------------------------------------|------------------------------------------|--------------------------------------------|---------------------------------------------------------------------------------------|-------------------------------------------------------------------|
|      |                         |                   |              |                                                        |                                          |                                            | heparin binding                                                                       |                                                                   |
| a40  | Q2KJ25<br>(PSD12_BOVIN) | 118/12            | 35%          | <b>26S proteasome non-ATPase regulatory subunit 12</b> | <b>Predicted intracellular proteins,</b> | <b>INTRACELLULAR</b><br>(cytosol, nucleus) | Unknown                                                                               | Proteasome-mediated ubiquitin-dependent protein catabolic process |
| a51  | Q2HJG4<br>(TDRD3_BOVIN) | 89/10             | 17%          | <b>Tudor domain-containing protein 3</b>               | <b>Predicted intracellular proteins,</b> | <b>INTRACELLULAR</b><br>(nucleus, cytosol) | Chromatin binding<br>Methylated histone binding<br>Transcription coactivator activity | Chromatin organization (chromatin regulator)                      |

<sup>u</sup> – data obtained from <https://www.uniprot.org/>

<sup>p</sup> – data obtained from <https://www.proteinatlas.org/>

Matches - the number of peptides in the MS spectrum that match the sequences from the database.

SEQ COV = sequence coverage - what percentage of the protein found in the study is covered by peptides from the MS spectrum.
